# Supplementary figures and images for: Optimization of Fermentation Conditions and Product Identification of a Saponin-Producing Endophytic Fungus
Source: MDPI journal article supplement (doi:10.3390/microorganisms11092331), 2023-09-16

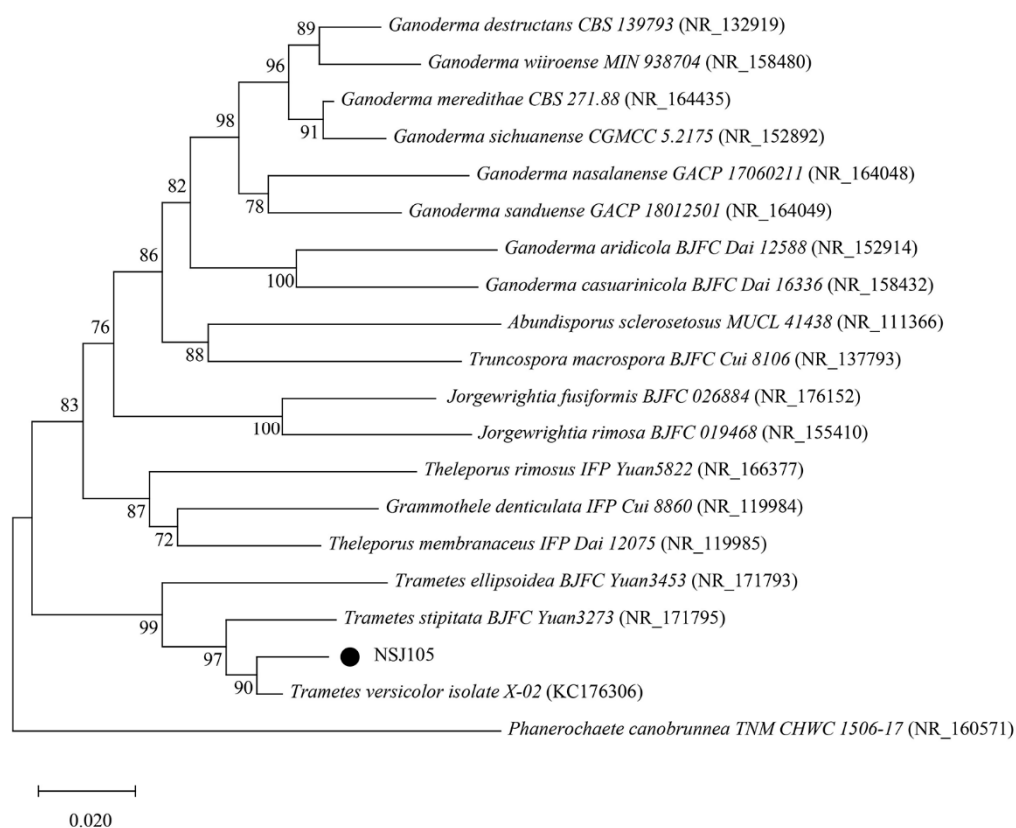

**Figure S1.** Phylogenetic tree characterization of endophytic fungus NSJ105.

Supplement: s1 [file s1]

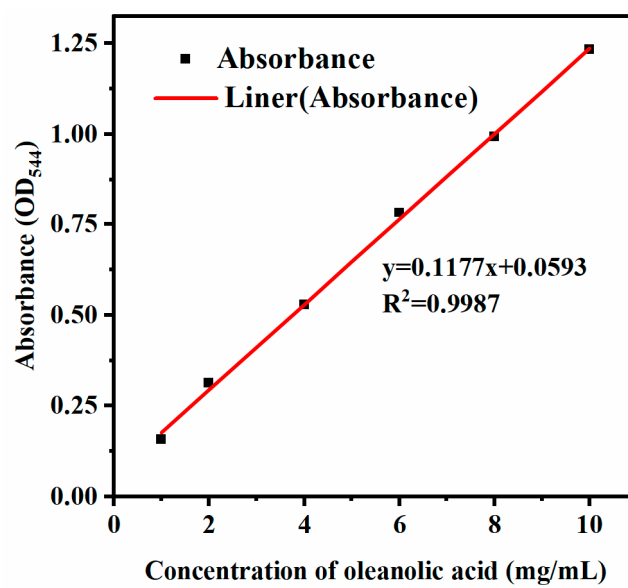

**Figure S2.** Standard curve for calculation of concentration of total saponins.

Supplement: s1 [file s1]
